# Supplementary material for: Synthesis and optical wireless communication application of high efficiency extreme blue CsPbBr3 nanoplates
Source: Royal Society of Chemistry journal article supplement (doi:10.1039/d4tc00151f), 2024-01-01
Supplement: d4tc00151f1.pdf [file d4tc00151f1.pdf]

## Supplementary Information

### Synthesis and optical wireless communication application of high efficiency extreme blue CsPbBr<sub>3</sub> nanoplates

Zhanpeng Wang,<sup>#abc</sup> Luyang Hou,<sup>#abc</sup> Jingzhou Li,<sup>\*bc</sup> Jiahao Zhang,<sup>abc</sup> Hongyu Yang,<sup>bc</sup> Yichi Zhong,<sup>d</sup>  
Hongxing Dong,<sup>\*abc</sup> Long Zhang<sup>ab</sup>

<sup>a</sup>Shanghai Institute of Optics and Fine Mechanic, Chinese Academy of Sciences, Shanghai 201800, China. hongxingd@siom.ac.cn

<sup>b</sup>Hangzhou Institute for Advanced Study, University of Chinese Academy of Science, Hangzhou 310024, China. lijingzhou@ucas.ac.cn

<sup>c</sup>University of Chinese Academy of Sciences, Beijing 100049, China

<sup>d</sup>Department of Physics, College of Mathematics and Physics, Chengdu University of Technology, Chengdu 610059, China.

\*Email: [lijingzhou@ucas.ac.cn](mailto:lijingzhou@ucas.ac.cn); [hongxingd@siom.ac.cn](mailto:hongxingd@siom.ac.cn)

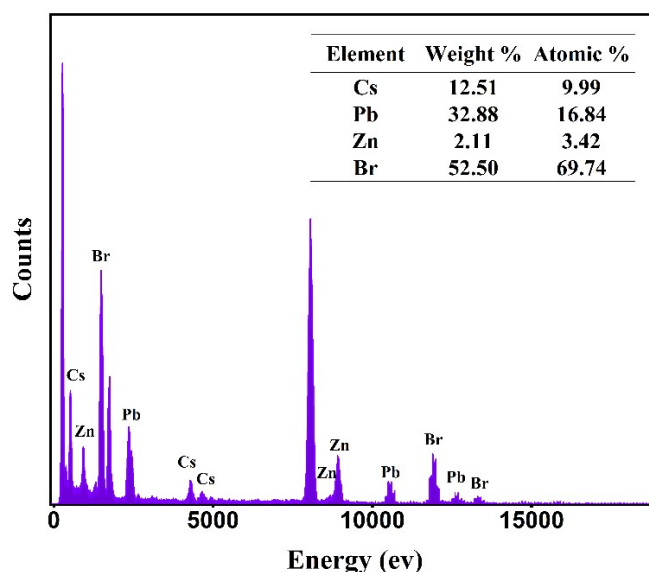

**Fig. S1** The atomic percent of CsPbBr<sub>3</sub> NPLs quantified semiquantitatively from EDS.

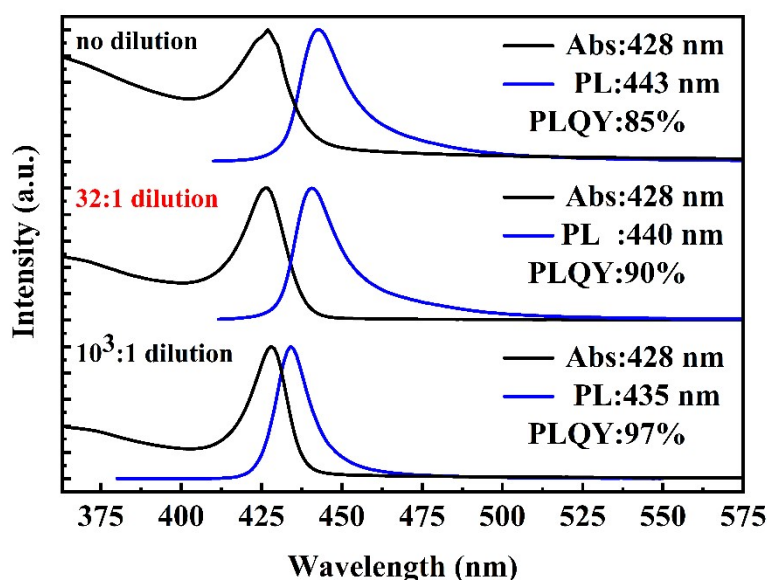

**Fig. S2** Spectrum features (absorbance and PL) and PLQY contrast of CsPbBr<sub>3</sub> NPLs solution with different dilution degree.

According to the results, the absorption peak remained unchanged and was located near 428nm with increasing dilution degree, meaning good stability and optical properties consistency of CsPbBr<sub>3</sub> nanoplatelets. The photoluminescence peak redshifts from 443 nm (no dilution), 440 nm (32 times dilution) to 435 nm (1000 times dilution) with increasing dilution degree. Meanwhile, the PLQY increases with increasing dilution degree. Reabsorption phenomenon is responsible for both the change of PL and PLQY. In short, the CsPbBr<sub>3</sub> nanoplatelets material still maintains high stability and good optical properties according to our additional experimental results.
